# Supplementary material for: Long Noncoding RNA-EBIC Promotes Tumor Cell Invasion by Binding to EZH2 and Repressing E-Cadherin in Cervical Cancer
Source: PLOS journal article supplement (doi:10.1371/journal.pone.0100340), 2014-07-09
Supplement: S5 (10.1371/journal.pone.0100340.s005) [file journal.pone.0100340.s005]

**Supplementary Table 3. The 60 differential mRNAs screened out from the overlap outcome of microarray data and CCDB.**

| **gene_symbol** | **Fold-change** | **regulation** | **gene_symbol** | **Fold-change** | **regulation** |
| --- | --- | --- | --- | --- | --- |
| [APOD](http://crdd.osdd.net/raghava/ccdb/searchResultt.php?name=APOD) | 0.088 | down | [CDKN2A](http://crdd.osdd.net/raghava/ccdb/searchResultt.php?name=CDKN2A) | 3.48 | up |
| [ESR1](http://crdd.osdd.net/raghava/ccdb/searchResultt.php?name=ESR1) | 0.17 | down | [TRIP13](http://crdd.osdd.net/raghava/ccdb/searchResultt.php?name=TRIP13) | 3.12 | up |
| [IGFBP5](http://crdd.osdd.net/raghava/ccdb/searchResultt.php?name=IGFBP5) | 0.24 | down | [TOP2A](http://crdd.osdd.net/raghava/ccdb/searchResultt.php?name=TOP2A) | 3.1 | up |
| [CRYAB](http://crdd.osdd.net/raghava/ccdb/searchResultt.php?name=CRYAB) | 0.26 | down | [CCNB1](http://crdd.osdd.net/raghava/ccdb/searchResultt.php?name=CCNB1) | 2.91 | up |
| [TIMP3](http://crdd.osdd.net/raghava/ccdb/searchResultt.php?name=TIMP3) | 0.39 | down | [CCNE1](http://crdd.osdd.net/raghava/ccdb/searchResultt.php?name=CCNE1) | 2.7 | up |
| [CYR61](http://crdd.osdd.net/raghava/ccdb/searchResultt.php?name=CYR61) | 0.44 | down | [AIM2](http://crdd.osdd.net/raghava/ccdb/searchResultt.php?name=AIM2) | 2.67 | up |
| [PLAGL1](http://crdd.osdd.net/raghava/ccdb/searchResultt.php?name=PLAGL1) | 0.5 | down | [EPCAM](http://crdd.osdd.net/raghava/ccdb/searchResultt.php?name=EPCAM) | 2.67 | up |
| [TBX3](http://crdd.osdd.net/raghava/ccdb/searchResultt.php?name=TBX3) | 0.51 | down | [E2F1](http://crdd.osdd.net/raghava/ccdb/searchResultt.php?name=E2F1) | 2.5 | up |
| [GJA1](http://crdd.osdd.net/raghava/ccdb/searchResultt.php?name=GJA1) | 0.55 | down | [EZH2](http://crdd.osdd.net/raghava/ccdb/searchResultt.php?name=EZH2) | 2.42 | up |
| [NTN4](http://crdd.osdd.net/raghava/ccdb/searchResultt.php?name=NTN4) | 0.73 | down | [MCM2](http://crdd.osdd.net/raghava/ccdb/searchResultt.php?name=MCM2) | 2.39 | up |
| [OAT](http://crdd.osdd.net/raghava/ccdb/searchResultt.php?name=OAT) | 0.73 | down | [PCNA](http://crdd.osdd.net/raghava/ccdb/searchResultt.php?name=PCNA) | 2.23 | up |
| [RARA](http://crdd.osdd.net/raghava/ccdb/searchResultt.php?name=RARA) | 0.74 | down | [TYMS](http://crdd.osdd.net/raghava/ccdb/searchResultt.php?name=TYMS) | 2.23 | up |
| [MMP1](http://crdd.osdd.net/raghava/ccdb/searchResultt.php?name=MMP1) | 9.71 | up | [MCM4](http://crdd.osdd.net/raghava/ccdb/searchResultt.php?name=MCM4) | 2.16 | up |
| [MMP12](http://crdd.osdd.net/raghava/ccdb/searchResultt.php?name=MMP12) | 8.32 | up | [SCD](http://crdd.osdd.net/raghava/ccdb/searchResultt.php?name=SCD) | 2.16 | up |
| [MMP3](http://crdd.osdd.net/raghava/ccdb/searchResultt.php?name=MMP3) | 7.86 | up | [PTTG1](http://crdd.osdd.net/raghava/ccdb/searchResultt.php?name=PTTG1) | 2.12 | up |
| [SYCP2](http://crdd.osdd.net/raghava/ccdb/searchResultt.php?name=SYCP2) | 3.8 | up | [SKP2](http://crdd.osdd.net/raghava/ccdb/searchResultt.php?name=SKP2) | 2.1 | up |
| [TPX2](http://crdd.osdd.net/raghava/ccdb/searchResultt.php?name=TPX2) | 3.71 | up | [CKS2](http://crdd.osdd.net/raghava/ccdb/searchResultt.php?name=CKS2) | 2.07 | up |
| [ECT2](http://crdd.osdd.net/raghava/ccdb/searchResultt.php?name=ECT2) | 3.6 | up | [MET](http://crdd.osdd.net/raghava/ccdb/searchResultt.php?name=MET) | 1.96 | up |
| [ANLN](http://crdd.osdd.net/raghava/ccdb/searchResultt.php?name=ANLN) | 3.55 | up | [CDK2](http://crdd.osdd.net/raghava/ccdb/searchResultt.php?name=CDK2) | 1.91 | up |
| [MCM3](http://crdd.osdd.net/raghava/ccdb/searchResultt.php?name=MCM3) | 1.83 | up | [GSS](http://crdd.osdd.net/raghava/ccdb/searchResultt.php?name=GSS) | 1.5 | up |
| [DEK](http://crdd.osdd.net/raghava/ccdb/searchResultt.php?name=DEK) | 1.74 | up | [HIST2H2BE](http://crdd.osdd.net/raghava/ccdb/searchResultt.php?name=HIST2H2BE) | 1.5 | up |
| [STAT1](http://crdd.osdd.net/raghava/ccdb/searchResultt.php?name=STAT1) | 1.71 | up | [HSPD1](http://crdd.osdd.net/raghava/ccdb/searchResultt.php?name=HSPD1) | 1.43 | up |
| [BST2](http://crdd.osdd.net/raghava/ccdb/searchResultt.php?name=BST2) | 1.66 | up | [E2F2](http://crdd.osdd.net/raghava/ccdb/searchResultt.php?name=E2F2) | 1.42 | up |
| [BRIX1](http://crdd.osdd.net/raghava/ccdb/searchResultt.php?name=BRIX1) | 1.63 | up | [ADRM1](http://crdd.osdd.net/raghava/ccdb/searchResultt.php?name=ADRM1) | 1.41 | up |
| [DNMT1](http://crdd.osdd.net/raghava/ccdb/searchResultt.php?name=DNMT1) | 1.61 | up | [GRB2](http://crdd.osdd.net/raghava/ccdb/searchResultt.php?name=GRB2) | 1.36 | up |
| [TARS](http://crdd.osdd.net/raghava/ccdb/searchResultt.php?name=TARS) | 1.6 | up | [MRPL11](http://crdd.osdd.net/raghava/ccdb/searchResultt.php?name=MRPL11) | 1.35 | up |
| [PLSCR1](http://crdd.osdd.net/raghava/ccdb/searchResultt.php?name=PLSCR1) | 1.58 | up | [RALY](http://crdd.osdd.net/raghava/ccdb/searchResultt.php?name=RALY) | 1.34 | up |
| [CSE1L](http://crdd.osdd.net/raghava/ccdb/searchResultt.php?name=CSE1L) | 1.57 | up | [DDX27](http://crdd.osdd.net/raghava/ccdb/searchResultt.php?name=DDX27) | 1.32 | up |
| [MRPS23](http://crdd.osdd.net/raghava/ccdb/searchResultt.php?name=MRPS23) | 1.52 | up | [RNF114](http://crdd.osdd.net/raghava/ccdb/searchResultt.php?name=RNF114) | 1.32 | up |
| [BIRC5](http://crdd.osdd.net/raghava/ccdb/searchResultt.php?name=BIRC5) | 1.5 | up | [ILF2](http://crdd.osdd.net/raghava/ccdb/searchResultt.php?name=ILF2) | 1.29 | up |
