# Supplementary material for: Long Noncoding RNA-EBIC Promotes Tumor Cell Invasion by Binding to EZH2 and Repressing E-Cadherin in Cervical Cancer
Source: PLOS journal article supplement (doi:10.1371/journal.pone.0100340), 2014-07-09
Supplement: S6 (10.1371/journal.pone.0100340.s006) [file journal.pone.0100340.s006]

**Supplementary Table 4. The node information of EZH2 sub-network in the coexpression network of para-tumor group.**

| **Genesymbol/lncRNA1** | **style1** | **FC** | **type1** | **Genesymbol/lncRNA2** | **style2** | **FC** | **type2** | **interaction** |
| --- | --- | --- | --- | --- | --- | --- | --- | --- |
| EZH2 | up | 2.42 | coding | TI18382REF_SNHG14_012 | down | 0.37 | noncoding | -0.868825749 |
| EZH2 | up | 2.42 | coding | TI13831SEQ | up | 3.08 | noncoding | 0.865278779 |
| EZH2 | up | 2.42 | coding | HIST2H2BE | up | 2.32 | coding | 0.872906337 |
| EZH2 | up | 2.42 | coding | PTTG1 | up | 2.12 | coding | 0.873478141 |
| EZH2 | up | 2.42 | coding | TI21327REF_RP11-415J8.3_001 | up | 2.02 | noncoding | 0.880127937 |
| EZH2 | up | 2.42 | coding | TI09485SEQ | up | 2.2 | noncoding | 0.899004125 |
| EZH2 | up | 2.42 | coding | TPX2 | up | 3.71 | coding | 0.907393297 |
| EZH2 | up | 2.42 | coding | TOP2A | up | 3.11 | coding | 0.911237085 |
| EZH2 | up | 2.42 | coding | TI18318REF_EGLN | up | 2.07 | noncoding | 0.924381187 |
| EZH2 | up | 2.42 | coding | MCM2 | up | 2.42 | coding | 0.938240658 |
| EZH2 | up | 2.42 | coding | TI10124SEQ | up | 2.7 | noncoding | 0.953582118 |
| EZH2 | up | 2.42 | coding | MCM4 | up | 2.16 | coding | 0.96483025 |
| EZH2 | up | 2.42 | coding | TI22687REF_MCM4_001 | up | 2.45 | noncoding | 0.965635516 |
| EZH2 | up | 2.42 | coding | TYMS | up | 2.23 | coding | 0.985012498 |
| EZH2 | up | 2.42 | coding | PCNA | up | 2.23 | coding | 0.996878143 |
| EZH2 | up | 2.42 | coding | ASK00420NTNR | down | 0.31 | noncoding | -0.98763605 |
| EZH2 | up | 2.42 | coding | CDKN2A | up | 3.48 | coding | 0.9549936 |
| EZH2 | up | 2.42 | coding | CDK2 | up | 2.23 | coding | 0.961136617 |
| EZH2 | up | 2.42 | coding | DEK | up | 2.18 | coding | 0.986782369 |
| EZH2 | up | 2.42 | coding | TI17313REF | up | 2.22 | noncoding | 0.946128852 |

(FC: fold-change)
